# Supplementary material
Source: PubMed Central journal article supplement (PMC7365741)
Supplement: NIHMS1541620-supplement-1.pdf [file NIHMS1541620-supplement-1.pdf]

**Supplementary Table 1.** Additional maternal and fetal characteristics of the study population

| Characteristics of Study Participants               | Mean $\pm$ SD or n (%)      |                           |                     |
|-----------------------------------------------------|-----------------------------|---------------------------|---------------------|
|                                                     | Female offspring<br>(n=149) | Male offspring<br>(n=152) | Combined<br>(n=301) |
| Married, n (%)                                      | 116 (77.9)                  | 110 (72.4)                | 226 (75.1)          |
| $\leq 12$ years of education, n (%)                 | 48 (32.2)                   | 45 (29.7)                 | 93 (30.9)           |
| Medically Insured, n (%)                            | 90 (60.4)                   | 94 (61.8)                 | 184 (61.1)          |
| Private Insurance Holder vs Medicaid, n (%)         | 79 (56.0)                   | 71 (50.4)                 | 150 (53.2)          |
| Smoked cigarettes in the past 6 mo, n (%)           | 0 (0)                       | 0 (0)                     | 0 (0)               |
| Consumed alcoholic beverage in the past week, n (%) | 1 (0.7)                     | 1 (0.7)                   | 2 (0.7)             |
| Gravidity, n (%)                                    |                             |                           |                     |
| 1                                                   | 49 (32.9)                   | 54 (35.5)                 | 103 (34.2)          |
| 2                                                   | 48 (32.2)                   | 48 (31.6)                 | 92 (32.0)           |
| $\geq 3$                                            | 52 (34.9)                   | 50 (32.9)                 | 102 (34.0)          |
| Nulliparous, n (%)                                  | 68 (45.6)                   | 72 (47.4)                 | 140 (46.5)          |
| Mode of Onset of Labor, n (%)                       |                             |                           |                     |
| C-section (no labor)                                | 29 (19.5)                   | 30 (19.7)                 | 59 (19.6)           |
| Spontaneous                                         | 80 (53.7)                   | 66 (43.4)                 | 146 (48.5)          |
| Induced                                             | 40 (26.9)                   | 56 (36.8)                 | 96 (31.9)           |
| Preeclamptic, n (%)                                 | 4 (2.7)                     | 4 (2.6)                   | 8 (2.7)             |
| Maternal Ancestry Proportions                       |                             |                           |                     |
| East Asian among Asian/Pacific Islander             | 0.81 $\pm$ 0.29             | 0.77 $\pm$ 0.31           | 0.78 $\pm$ 0.30     |
| European among White/non-Hispanic                   | 0.94 $\pm$ 0.12             | 0.94 $\pm$ 0.12           | 0.94 $\pm$ 0.12     |
| European among Black/non-Hispanic                   | 0.15 $\pm$ 0.12             | 0.22 $\pm$ 0.14           | 0.18 $\pm$ 0.13     |
| European among Hispanic                             | 0.49 $\pm$ 0.21             | 0.47 $\pm$ 0.18           | 0.48 $\pm$ 0.19     |
| African among Black/non-Hispanic                    | 0.82 $\pm$ 0.12             | 0.75 $\pm$ 0.15           | 0.79 $\pm$ 0.14     |
| African among Hispanic                              | 0.19 $\pm$ 0.17             | 0.20 $\pm$ 0.17           | 0.19 $\pm$ 0.17     |
| Native American among Hispanic                      | 0.30 $\pm$ 0.27             | 0.31 $\pm$ 0.21           | 0.30 $\pm$ 0.24     |
| Fetal Ancestry Proportions                          | -                           | -                         | -                   |
| East Asian among Asian/Pacific Islander             | 0.76 $\pm$ 0.30             | 0.71 $\pm$ 0.33           | 0.74 $\pm$ 0.32     |
| European among White/non-Hispanic                   | 0.92 $\pm$ 0.15             | 0.89 $\pm$ 0.17           | 0.91 $\pm$ 0.16     |
| European among Black/non-Hispanic                   | 0.16 $\pm$ 0.11             | 0.23 $\pm$ 0.15           | 0.19 $\pm$ 0.13     |
| European among Hispanic                             | 0.48 $\pm$ 0.19             | 0.49 $\pm$ 0.18           | 0.48 $\pm$ 0.19     |
| African among Black/non-Hispanic                    | 0.81 $\pm$ 0.13             | 0.73 $\pm$ 0.17           | 0.78 $\pm$ 0.15     |
| African among Hispanic                              | 0.22 $\pm$ 0.19             | 0.19 $\pm$ 0.17           | 0.21 $\pm$ 0.18     |
| Native American among Hispanic                      | 0.28 $\pm$ 0.25             | 0.29 $\pm$ 0.22           | 0.28 $\pm$ 0.23     |
| Placental DNA methylation age, wk                   | 35.7 $\pm$ 1.6              | 35.6 $\pm$ 1.4            | 35.7 $\pm$ 1.5      |
| Placental DNA methylation age acceleration, wk      | -3.9 $\pm$ 1.8              | -3.8 $\pm$ 1.6            | -3.8 $\pm$ 1.7      |

**Supplementary Table 2.** Correlation estimates between maternal/offspring factors and placental age acceleration

| Maternal and offspring factors         | Female offspring             |             | Male offspring               |              | Combined                     |              |
|----------------------------------------|------------------------------|-------------|------------------------------|--------------|------------------------------|--------------|
|                                        | Pearson correlation (95% CI) | P-value     | Pearson correlation (95% CI) | P-value      | Pearson correlation (95% CI) | P-value      |
| Maternal age                           | 0.12 (-0.04, 0.28)           | 0.14        | 0.14 (-0.02, 0.29)           | 0.09         | <b>0.13 (0.02, 0.24)</b>     | <b>0.03</b>  |
| 1st trimester systolic blood pressure  | 0.09 (-0.08, 0.26)           | 0.31        | <b>-0.28 (-0.43, -0.12)</b>  | <b>0.001</b> | -0.08 (-0.20, 0.04)          | 0.24         |
| 1st trimester diastolic blood pressure | 0.09 (-0.08, 0.26)           | 0.31        | <b>-0.20 (-0.36, -0.04)</b>  | <b>0.01</b>  | -0.04 (-0.16, 0.08)          | 0.27         |
| 2nd trimester systolic blood pressure  | 0.07 (-0.09, 0.23)           | 0.58        | <b>-0.23 (-0.38, -0.06)</b>  | <b>0.01</b>  | -0.05 (-0.17, 0.07)          | 0.22         |
| 2nd trimester diastolic blood pressure | 0.03 (-0.13, 0.19)           | 0.51        | -0.15 (-0.31, 0.01)          | 0.21         | -0.05 (-0.17, 0.07)          | 0.22         |
| 3rd trimester systolic blood pressure  | -0.01 (-0.17, 0.16)          | 0.45        | <b>-0.25 (-0.40, -0.09)</b>  | <b>0.001</b> | <b>-0.12 (-0.23, 0.00)</b>   | <b>0.04</b>  |
| 3rd trimester diastolic blood pressure | -0.02 (-0.19, 0.14)          | 0.44        | <b>-0.27 (-0.41, -0.11)</b>  | <b>0.001</b> | <b>-0.13 (-0.24, -0.01)</b>  | <b>0.01</b>  |
| pre-pregnancy BMI                      | 0.03 (-0.14, 0.19)           | 0.74        | <b>-0.19 (-0.34, -0.03)</b>  | <b>0.02</b>  | -0.08 (-0.19, 0.04)          | 0.18         |
| 1st Trimester Gestational Weight Gain  | -0.08 (-0.23, 0.08)          | 0.34        | <b>-0.17 (-0.32, -0.01)</b>  | <b>0.04</b>  | -0.11 (-0.22, -0.002)        | 0.05         |
| 2nd Trimester Gestational Weight Gain  | -0.12 (-0.27, 0.04)          | 0.15        | <b>-0.21 (-0.36, -0.05)</b>  | <b>0.01</b>  | <b>-0.16 (-0.27, -0.05)</b>  | <b>0.004</b> |
| 3rd Trimester Gestational Weight Gain  | <b>-0.17 (-0.32, -0.01)</b>  | <b>0.04</b> | <b>-0.18 (-0.33, -0.02)</b>  | <b>0.03</b>  | <b>-0.17 (-0.28, -0.06)</b>  | <b>0.003</b> |

**Supplementary Table 3.** Change in placental epigenetic age acceleration with each unit increase in a maternal cardiometabolic factor

| Maternal and offspring cardiometabolic factors | Female offspring                               |         | Male offspring                                 |             | Combined                                       |             |
|------------------------------------------------|------------------------------------------------|---------|------------------------------------------------|-------------|------------------------------------------------|-------------|
|                                                | Mean PAA change (95% CI) in weeks <sup>1</sup> | P-value | Mean PAA change (95% CI) in weeks <sup>1</sup> | P-value     | Mean PAA change (95% CI) in weeks <sup>1</sup> | P-value     |
| <sup>2</sup> Trimester specific SBP, mmHG      |                                                |         |                                                |             |                                                |             |
| 1st Trimester                                  | 0.10 (-0.28, 0.48)                             | 0.61    | <b>-0.31 (-0.59, -0.04)</b>                    | <b>0.03</b> | -0.11 (-0.34, 0.11)                            | 0.32        |
| 2nd Trimester                                  | 0.08 (-0.29, 0.45)                             | 0.66    | -0.21 (-0.60, 0.18)                            | 0.29        | 0.01 (-0.25, 0.27)                             | 0.97        |
| 3rd Trimester                                  | -0.04 (-0.43, 0.35)                            | 0.83    | -0.30 (-0.66, 0.06)                            | 0.06        | -0.13 (-0.39, 0.13)                            | 0.33        |
| <sup>2</sup> Trimester specific DBP, mmHG      |                                                |         |                                                |             |                                                |             |
| 1st Trimester                                  | 0.21 (-0.29, 0.71)                             | 0.40    | <b>-0.43 (-0.82, -0.04)</b>                    | <b>0.03</b> | -0.09 (-0.39, 0.22)                            | 0.57        |
| 2nd Trimester                                  | -0.03 (-0.64, 0.57)                            | 0.92    | -0.20 (-0.75, 0.35)                            | 0.47        | -0.03 (-0.42, 0.37)                            | 0.89        |
| 3rd Trimester                                  | 0.01 (-0.57, 0.59)                             | 0.97    | <b>-0.57 (-1.09, -0.05)</b>                    | <b>0.03</b> | -0.21 (-0.59, 0.17)                            | 0.27        |
| Pre-pregnancy BMI, kg/m <sup>2</sup>           |                                                |         |                                                |             |                                                |             |
| Obese (≥30.0)                                  | 0.22 (-0.90, 1.33)                             | 0.70    | <b>-1.24 (-2.24, -0.25)</b>                    | <b>0.01</b> | -0.60 (-1.31, 0.12)                            | 0.10        |
| Overweight (25.0-30.0)                         | -0.10 (-0.81, 0.61)                            | 0.78    | -0.40 (-1.07, 0.26)                            | 0.23        | -0.28 (-0.75, 0.19)                            | 0.25        |
| Normal (<25)                                   | Ref                                            | -       | Ref                                            | -           | Ref                                            | -           |
| GWG (kg/week)                                  |                                                |         |                                                |             |                                                |             |
| 1st Trimester                                  | -1.51 (-3.54, 0.52)                            | 0.14    | -1.40 (-2.82, 0.02)                            | 0.05        | <b>-1.46 (-2.61, -0.31)</b>                    | <b>0.01</b> |
| 2nd Trimester                                  | -1.57 (-3.65, 0.52)                            | 0.14    | -1.19 (-2.91, 0.52)                            | 0.17        | <b>-1.70 (-3.00, -0.40)</b>                    | <b>0.01</b> |
| 3rd Trimester                                  | -1.53 (-3.64, 0.59)                            | 0.16    | -0.90 (-2.81, 1.01)                            | 0.35        | <b>-1.71 (-3.11, -0.32)</b>                    | <b>0.02</b> |
| Maternal age, yr                               | 0.05 (-0.02, 0.12)                             | 0.16    | 0.03 (-0.03, 0.09)                             | 0.27        | 0.04 (-0.01, 0.09)                             | 0.09        |
| Maternal age group                             |                                                |         |                                                |             |                                                |             |
| ≥30 years                                      | 0.54 (-0.52, 1.61)                             | 0.31    | 0.46 (-0.54, 1.46)                             | 0.37        | 0.39 (-0.32, 1.01)                             | 0.28        |
| 30-35 years                                    | -0.40 (-1.17, 0.36)                            | 0.30    | 0.36 (-0.27, 0.99)                             | 0.26        | -0.01 (-0.49, 0.48)                            | 0.98        |
| <30 years                                      | Ref                                            | -       | Ref                                            | -           | Ref                                            | -           |
| Fetal sex                                      |                                                |         |                                                |             |                                                |             |
| Male                                           | NA                                             |         | NA                                             |             | 0.20 (-0.21, 0.60)                             | 0.34        |
| Female                                         | NA                                             |         | NA                                             |             | Ref                                            | -           |

<sup>1</sup>Models included parity, health insurance, mode of onset of labor, marital status, educational status, preeclampsia status, and offspring sex as adjustment variables.

<sup>2</sup> per 10mmHG increase in DBP and SBP

Statistically significant estimates (P<0.05) are highlighted in bold

Abbreviation: GWG, gestational weight gain; SBP, Systolic blood pressure; DBP, Diastolic blood pressure; PAA, placental epigenetic age acceleration

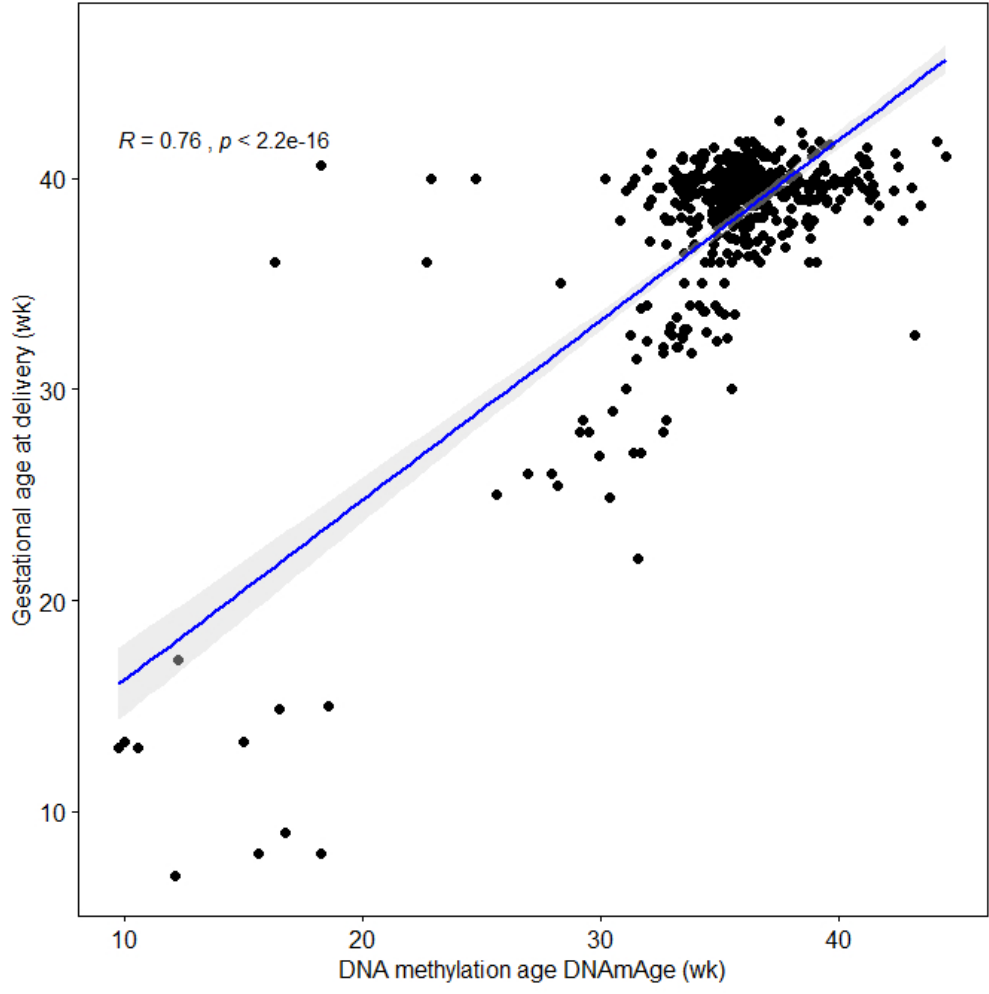

Supplementary Fig 1. Correlations between estimated placental DNA methylation age and gestational age at birth.

177x177mm (96 x 96 DPI)
